# Supplementary material for: A National Status Report on United States Coral Reefs Based on 2012–2018 Data From National Oceanic and Atmospheric Administration’s National Coral Reef Monitoring Program
Source: Frontiers journal article supplement (doi:10.3389/fmars.2021.812216), 2022-02-03
Supplement: Data_Sheet_1.docx [file Data_Sheet_1.docx]

Supplementary Table 1: NCRMP frequency of data collection from 2013–2018 by theme and ocean basin.

| **Year** | **Atlantic Biological**  **(Benthic and Fish)** | **Atlantic Climate** | **Pacific Biological (Benthic and Fish) and Climate** | **Socioeconomic (Human connections)** |
| --- | --- | --- | --- | --- |
| 2012 | N/A | N/A | American Samoa,  Pacific Remote Islands | N/A |
| 2013 | U.S. Virgin Islands,  Flower Garden Banks | Southeast Florida,  Florida Keys | Main Hawaiian Islands,  NW Hawaiian Islands | N/A |
| 2014 | Florida, Puerto Rico | U.S. Virgin Islands,  Southeast Florida | Pacific Remote Islands, Guam,  Northern Mariana Islands | American Samoa,  Florida |
| 2015 | U.S. Virgin Islands,  Flower Garden Banks | Puerto Rico, Flower Garden Banks,  Dry Tortugas (Florida) | American Samoa,  Pacific Remote Islands | Puerto Rico, Main Hawaiian Islands |
| 2016 | Florida, Puerto Rico | St. Croix (U.S. Virgin Islands),  Southeast Florida,  Florida Keys | Main Hawaiian Islands,  NW Hawaiian Islands | Guam |
| 2017 | U.S. Virgin Islands | Puerto Rico,  St. Thomas and  St. John (U.S. Virgin Islands) | Pacific Remote Islands,  Guam,  Northern Mariana Islands | Northern Mariana Islands,  U.S. Virgin Islands |
| 2018 | Florida, Flower Garden Banks | Dry Tortugas (Florida) | American Samoa,  Pacific Remote Islands | N/A |

Supplementary Table 2: Reference datasets for Atlantic benthic and fish indicators by jurisdiction. For more detailed information about how these references were chosen, refer to Donovan et al. 2020.

| **Jurisdiction** | **Benthic reference dataset** | **Fish reference dataset** |
| --- | --- | --- |
| Flower Garden Banks | Flower Garden Banks National Marine Sanctuary Long Term Monitoring Program (1992–2013) (Johnston et al. 2018); Earliest available NCRMP survey data (2013) | Pre-NCRMP belt-transect data from NOAA’s National Center for Coastal Ocean Science (2006–2007) |
| Puerto Rico | Earliest available NCRMP survey data (2014) | Earliest available RVC NCRMP survey data in La Parguera, Mona, Desecheo (2016 and 2018) and Buck Island, and Virgin Islands Coral Reef Monument (2017) |
| U.S. Virgin Islands | Virgin Islands Territorial Coral Reef Monitoring Program (Smith et al. 2015);  National Park Service Inventory and Monitoring data (1999–2005) (National Park Service, 2009); Earliest available NCRMP survey data (2013) | Earliest available RVC NCRMP survey data in Buck Island and Virgin Islands Coral Reef Monument (2017) |
| Florida | Historic literature (1974–1999);  Southeast Coral Reef Evaluation and Monitoring Project (2003–2005) (Gilliam et al. 2017); Disturbance Response Monitoring (2005–2009) (Florida Fish and Wildlife Conservation Commission, 2018); Coral Reef Evaluation and Monitoring Project (1996–1999); Earliest available NCRMP survey data (2014) | RVC data from the Research Natural Area of the Dry Tortugas National Park (2011–2014) |
